# Supplementary material for: Long-Term Stability of TiS2–Alkylamine Hybrid Materials
Source: MDPI journal article supplement (doi:10.3390/ma15238297), 2022-11-22
Supplement: s1 [file s1]

## Long-term stability of TiS<sub>2</sub>-alkylamine hybrid materials

*Federica Ursi, Simone Virga, Gonzalo García-Espejo, Norberto Masciocchi, Antonino Martorana,  
Francesco Giannici*

### SUPPORTING INFORMATION

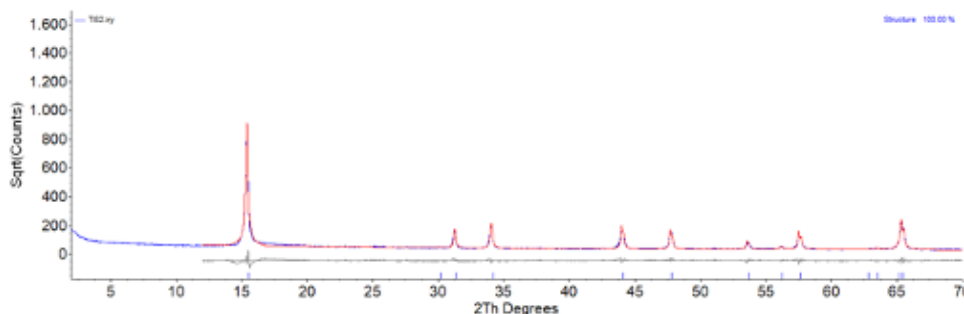

**Figure S1** - Rietveld refinement of the pristine TiS<sub>2</sub> material. Y-axis is in square root scale. All experimental peaks belong to the titanium disulfide structure. XRD modeling required the insertion of a strong textural component, with the preferential orientation parameter  $r_{001} = 0.42$  (in March-Dollase description,).

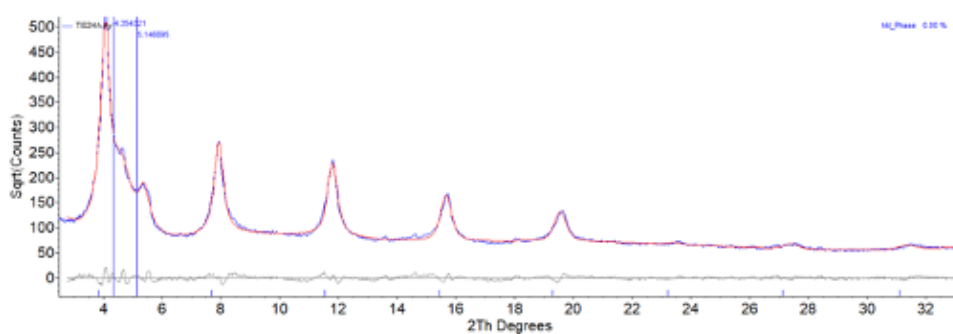

**Figure S2** - Structureless 1D Le Bail refinement of TiS<sub>2</sub>/HA hybrid *with 00l peaks only*. Y-axis is in square root scale. These experimental peaks are typical of an inflated titanium disulfide structure, with a significantly large interlayer spacing (23.0 Å, vs. 5.7 Å of the original TiS<sub>2</sub> powders). Two additional peaks (vertical lines at 4.35-5.14°) are attributed to minor contaminants characterized by different packings of HA molecules in the interlayer space, or, more likely, to a slightly lower amount of intercalated HA moieties.

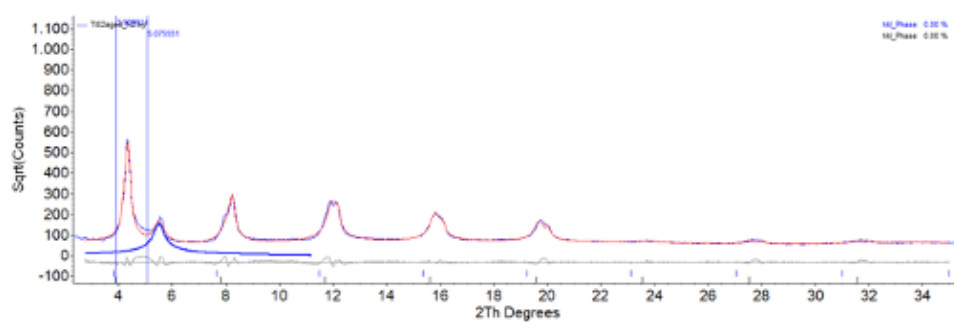

**Figure S3** - Structureless 1D Le Bail refinement of TiS<sub>2</sub>/HA (N<sub>2</sub>). Y-axis is in square root scale. No significant differences with respect to TiS<sub>2</sub>/HA. are evident. As explained in the main text, the spurious peak highlighted by the blue trace is attributed to different HA packing (or content).
